# Supplementary material for: Elevated developmental temperatures impact the size and allometry of morphological traits of the bumblebeeBombus terrestris
Source: Oxford University Press journal article supplement (doi:10.1242/jeb.245728), 2023-03-30
Supplement: jeb245728supp.pdf [file jeb245728supp.pdf]

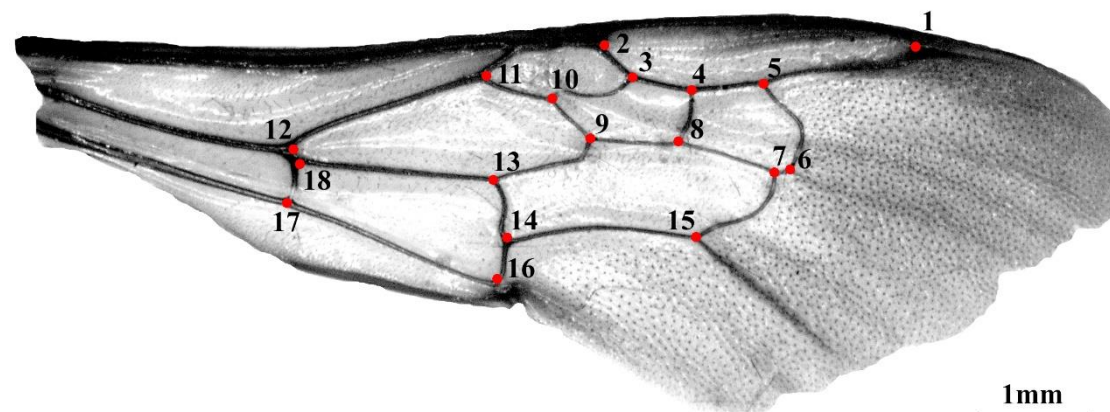

**Fig. S1.** Right forewing and 18 landmarks of a worker of the buff-tailed bumblebee *Bombus terrestris*.

**Table S1.** Dataset for each morphological trait

| Trait   | Sex    | Temperature (°C) | N   |
|---------|--------|------------------|-----|
| ITD     | Worker | 25               | 180 |
| ITD     | Worker | 33               | 163 |
| ITD     | Male   | 25               | 46  |
| ITD     | Male   | 33               | 67  |
| Antenna | Worker | 25               | 113 |
| Antenna | Worker | 33               | 97  |
| Antenna | Male   | 25               | 46  |
| Antenna | Male   | 33               | 61  |
| Tongue  | Worker | 25               | 95  |
| Tongue  | Worker | 33               | 82  |
| Tongue  | Male   | 25               | 46  |
| Tongue  | Male   | 33               | 67  |
| Wing    | Worker | 25               | 54  |
| Wing    | Worker | 33               | 60  |
| Wing    | Male   | 25               | 46  |
| Wing    | Male   | 33               | 67  |

**Table S2.** List of the next best candidate models to predict the impact of temperature on morphological traits and allometric components of workers

| Next best candidate model                                                                                                   | Predictor                            | Estimate | Std Error | p-value | $\Delta$ AICc |
|-----------------------------------------------------------------------------------------------------------------------------|--------------------------------------|----------|-----------|---------|---------------|
| ITD ~ Temperature + (1   Colony) + (1   Session)                                                                            | Intercept                            | 3.647    | 0.11      | 0.011   | 1.34          |
|                                                                                                                             | Temperature                          | 0.248    | 0.065     | 0.006   |               |
| Antennae ~ Temperature + (1   Colony)                                                                                       | Intercept                            | 3.63     | 0.093     | <0.001  | 8.89          |
|                                                                                                                             | Temperature                          | 0.248    | 0.132     | 0.083   |               |
| Tongue ~ Temperature + (1   Colony)                                                                                         | Intercept                            | 6.077    | 0.184     | <0.001  | 3.66          |
|                                                                                                                             | Temperature                          | 0.078    | 0.258     | 0.765   |               |
| Wing size ~ Temperature + (1   Colony)                                                                                      | Intercept                            | 7.333    | 0.185     | <0.001  | 2.25          |
|                                                                                                                             | Temperature                          | -0.041   | 0.253     | 0.873   |               |
| Log <sub>10</sub> (Antennae) ~ log <sub>10</sub> (ITD) + log <sub>10</sub> (ITD):Temperature + (1   Colony) + (1   Session) | Intercept                            | 0.657    | 0.095     | 0.004   | 6.74          |
|                                                                                                                             | Log <sub>10</sub> (Size)             | 0.496    | 0.052     | <0.001  |               |
|                                                                                                                             | Log <sub>10</sub> (Size):temperature | 0.022    | 0.016     | 0.188   |               |
| Log <sub>10</sub> (Tongue) ~ log <sub>10</sub> (ITD) + (1   Colony) + (1   Session)                                         | Intercept                            | 1.121    | 0.124     | <0.001  | 1.51          |
|                                                                                                                             | Log <sub>10</sub> (Size)             | 0.516    | 0.089     | <0.001  |               |
| Log <sub>10</sub> (Wing) ~ log <sub>10</sub> (ITD) + log <sub>10</sub> (ITD):Temperature + (1   Colony) + (1   Session)     | Intercept                            | 0.817    | 0.083     | <0.001  | 4.17          |
|                                                                                                                             | Log <sub>10</sub> (Size)             | 0.908    | 0.051     | <0.001  |               |
|                                                                                                                             | Log <sub>10</sub> (Size):temperature | -0.033   | 0.013     | 0.033   |               |

**Table S3.** List of the next best candidate models to predict the impact of temperature on morphological traits and allometric components of males

| Model                                                                                                                       | Predictor                            | Estimate | Std Error | p-value | $\Delta$ AICc |
|-----------------------------------------------------------------------------------------------------------------------------|--------------------------------------|----------|-----------|---------|---------------|
| ITD ~ Temperature + (1   Colony) + (1   Session)                                                                            | Intercept                            | 4.103    | 0.072     | <0.001  | 2.18          |
|                                                                                                                             | Temperature                          | 0.079    | 0.121     | 0.53    |               |
| Antennae ~ Temperature + (1   Colony) + (1   Session)                                                                       | Intercept                            | 5.228    | 0.162     | 0.01    | 1.88          |
|                                                                                                                             | Temperature                          | 0.186    | 0.202     | 0.382   |               |
| Tongue ~ Temperature + (1   Colony) + (1   Session)                                                                         | Intercept                            | 6.077    | 0.376     | 0.029   | 2.27          |
|                                                                                                                             | Temperature                          | 0.102    | 0.194     | 0.608   |               |
| Wing size ~ Temperature + (1   Colony) + (1   Session)                                                                      | Intercept                            | 7.333    | 0.185     | <0.001  | 2.33          |
|                                                                                                                             | Temperature                          | -0.041   | 0.253     | 0.873   |               |
| Log <sub>10</sub> (Antennae) ~ log <sub>10</sub> (ITD) + log <sub>10</sub> (ITD):Temperature + (1   Colony) + (1   Session) | Intercept                            | 1.028    | 0.134     | <0.001  | 7.8           |
|                                                                                                                             | Log <sub>10</sub> (Size)             | 0.433    | 0.091     | <0.001  |               |
|                                                                                                                             | Log <sub>10</sub> (Size):temperature | 0.01     | 0.024     | 0.691   |               |
| Log <sub>10</sub> (Tongue) ~ log <sub>10</sub> (ITD) + (1   Colony) + (1   Session)                                         | Intercept                            | 1.19     | 0.139     | <0.001  | 3.57          |
|                                                                                                                             | Log <sub>10</sub> (Size)             | 0.515    | 0.097     | <0.001  |               |
| Log <sub>10</sub> (Wing) ~ log <sub>10</sub> (ITD) + (1   Colony) + (1   Session)                                           | Intercept                            | 1.342    | 0.112     | <0.001  | 4.84          |
|                                                                                                                             | Log <sub>10</sub> (Size)             | 0.61     | 0.079     | <0.001  |               |
